# Supplementary material
Source: MDPI journal article supplement (https://www.mdpi.com/2071-1050/14/8/4560)
Supplement: s1 [file s1]

Archive with 4 entries (4 files):
- Supplementary File S1.xlsx
- Supplementary File S2.pdf
- Supplementary File S3.pdf
- Supplementary File S4.pdf
