# Supplementary material
Source: MDPI journal article supplement (https://www.mdpi.com/2071-1050/14/8/4560)
Supplement: s1 [file s1 › Supplementary File S1.xlsx]

## Sheet: Hoja3
	Clase		Método de valoración biofísico
	Provisión	Provisión de comida	Producción de comida (t/año)
		Suministro de agua fresca	Flujo de agua (m3/año)
	Regulación	Regulación de flujos de agua y mitigación de escorrentía	Capacidad de infiltración del suelo
			Porcentaje de área impermeable con respecto a la permeable
		Regulación de la temperatura urbana	Índice de área foliar (m2)
		Reducción del ruido	Reducción de ruido [dB (A)] / unidad de vegetación (m)
			Área foliar y distancia a caminos
		Purificación del aire	Flujo de contaminantes (O3 , SO 2 , NO 2 , CO, and PM 10 μm) (g/cm2/s) multiplicado por la cubierta arbórea 8M2)
		Regulación del clima (secuestro de carbono)	Secuestro de CO2 por árboles (carbono multiplicado por 3.67 para convertir a CO2)
		Polinización y dispersión de semillas	Diversidad de especies y abundancia de aves y abejorros.
		Tratamiento de desechos
			P, K, Mg y Ca en mg / kg en comparación con los estándares de calidad de suelo y agua dados
		Moderación de eventos ambientales extremos	Densidad de la cobertura de las barreras de vegetación que separan las áreas construidas del mar.
	Cultural	Desarrollo cognitivo y preservación del conocimiento	Participación, reificación y fuentes externas de memoria ecológica social.
		Recreación y salud	Área de espacios públicos verdes (ha) / habitante (o cada 1.000 habitantes)
			Autoinforme de salud general
		Avistamiento de animales (provisón de hábitat)	Abundancia de aves, mariposas y otros animales valorados por sus atributos estéticos.

## Sheet: Servicios y SUDS
	Categoría	Servicio	Descripción	Tipologías de retención	Tipologías de infiltración		Tipologías de filtración
				Humedales construidos	Superficies permeables	Cuencas de infiltración	Filtros de desagües y tuberías permeables (Filtros de arena, zanjas de infiltración)	Soluciones tradicionales de drenaje por tubería
	Servicios de provisión	Agua fresca	El agua dulce es otro ejemplo de los vínculos entre las categorías, en este caso, entre los servicios de aprovisionamiento y de regulación	Apoya la recarga de aguas subterráneas y puede atenuar los contaminantes	Hace una contribución parcial a la recarga de los recursos hídricos si hay una infiltración significativa en las aguas subterráneas o la salida a las masas de agua superficiales	Apoya la recarga de aguas subterráneas y puede atenuar los contaminantes	Hace una contribución parcial a la recarga de los recursos hídricos si hay una infiltración significativa en las aguas subterráneas o la salida a las masas de agua superficiales	No recarga el agua subterránea, aunque puede alimentar los recursos de agua de superficie, sin embargo, es probable que agregue contaminantes asociados con las oleadas de aguas pluviales concentradas
		Alimentos (por ejemplo, cultivos, frutas, pescado, etc.)	Incluye la amplia gama de productos alimenticios derivados de plantas, animales y microorganismos, así como materiales como madera, yute, cáñamo, seda y muchos otros productos derivados de los ecosistemas. La madera, el estiércol y otros materiales biológicos sirven como fuentes de energía	Los humedales construidos pueden permitir la extracción de cantidades limitadas de la agricultura periurbana, aunque rara vez se realizan en la práctica	Las superficies permeables no hacen provisiones para la agricultura periurbana	El hábitat simple de bajo porte ofrece pocas oportunidades para el cultivo de alimentos, incluida la agricultura periurbana, aunque los animales de pastoreo como conejos y gansos pueden ser cosechados con poca frecuencia	No hace provisión para la agricultura periurbana	La infraestructura pesada reduce el potencial para la agricultura periurbana
		Fibra y combustible (por ejemplo, madera, lana, etc.)		Potencial para la producción de fibra y combustible periurbanos, aunque rara vez se realiza en la práctica	Las superficies permeables no proveen la producción de fibra periurbana y combustible	El hábitat simple de bajo porte ofrece pocas oportunidades para la producción de fibra y combustible en zonas periurbanas, más allá del bajo potencial de compostaje de residuos verdes de la gestión y su uso potencial en la producción de bioenergía	No permite la producción de fibra y combustible periurbanos.	La infraestructura pesada reduce el potencial para la producción de fibra y combustible periurbanos
		Recursos genéticos (utilizados para la cría de cultivos / ganado y biotecnología)	Incluye los genes y la información genética utilizada para la cría de animales y plantas y la biotecnología	Los humedales construidos pueden albergar recursos genéticos, especialmente si se trata de un elemento de consideraciones de diseño	El pavimento permeable desplaza los ecosistemas que potencialmente albergan recursos genéticos	El hábitat simple y de bajo porte no ofrece oportunidades para que los ecosistemas alojen recursos genéticos	La infraestructura de drenaje y tuberías desplaza a los ecosistemas que potencialmente albergan recursos genéticos	La infraestructura pesada desplaza ecosistemas que potencialmente albergan recursos genéticos
		Productos bioquímicos, medicinas naturales, productos farmacéuticos	Muchos medicamentos, biocidas, aditivos alimentarios como los alginatos y materiales biológicos derivados de los ecosistemas	Los humedales construidos pueden albergar recursos medicinales, especialmente si se trata de un elemento de consideraciones de diseño	El pavimento permeable desplaza los ecosistemas que potencialmente albergan recursos medicinales	El hábitat simple y de bajo porte no ofrece ninguna oportunidad para que los ecosistemas alojen recursos medicinales	La infraestructura de drenaje y tuberías desplaza a los ecosistemas que pueden albergar recursos medicinales	La infraestructura pesada desplaza ecosistemas que potencialmente albergan recursos medicinales
		Recursos ornamentales (por ejemplo, conchas, flores, etc.)	Los productos animales, como las pieles y conchas, y las flores se utilizan como adornos, aunque el valor de estos recursos a menudo se determina culturalmente	Los humedales construidos pueden albergar recursos ornamentales, especialmente si se trata de un elemento de consideraciones de diseño	El pavimento permeable desplaza los ecosistemas que potencialmente albergan recursos ornamentales	El hábitat simple y de bajo porte no ofrece ninguna oportunidad para que los ecosistemas alojen recursos ornamentales	La infraestructura de drenaje y tuberías desplaza a los ecosistemas que pueden albergar recursos ornamentales	La infraestructura pesada desplaza ecosistemas que potencialmente albergan recursos ornamentales
		Recolección de energía	La madera, el estiércol y otros materiales biológicos sirven como fuentes de energía	Potencial para la producción de biocombustibles basada en la reutilización de residuos verdes del manejo de humedales	No brinda oportunidades para la recolección de energía	Potencial limitado para el aprovechamiento de biomasa para la producción de energía durante el manejo de rutina, aunque hay poca evidencia de que esta práctica ocurra operativamente	No brinda oportunidades para la recolección de energía	Si bien puede haber oportunidades para la recolección de energía del agua que fluye al ritmo de las tuberías, esto no se considera un servicio ecosistémico común o significativo
	Servicios de regulación	Regulación de la calidad del aire	Los ecosistemas contribuyen con sustancias químicas y extraen sustancias químicas de la atmósfera, lo que influye en muchos aspectos de la calidad del aire	Los humedales construidos pueden comprender una vegetación compleja, eficiente en el "lavado" y la transformación de los contaminantes de la calidad del aire	La infraestructura artificial no es compatible con los ecosistemas que regulan la calidad del aire	El hábitat simple y de bajo porte puede influir en la calidad del aire, aunque en una medida limitada en comparación con un hábitat complejo	La infraestructura artificial no es compatible con los ecosistemas que regulan la calidad del aire	La infraestructura de drenaje pesado no regula la calidad del aire
		Regulación del clima (microclima)	A escala local, los cambios en la cobertura del suelo pueden afectar la temperatura y la precipitación	Los humedales construidos pueden comprender una vegetación compleja eficiente en la modificación del microclima	La eliminación del hábitat reduce el potencial para modificar el clima local	El hábitat simple y de bajo porte puede influir en el microclima, aunque en una medida limitada en comparación con el hábitat complejo	La infraestructura artificial no es compatible con los ecosistemas que modifican el clima local	La infraestructura de drenaje pesado no contribuye a la modificación del clima local
		Regulación del clima (clima global)	A escala global, los ecosistemas desempeñan un papel importante en el clima, ya sea secuestrando o emitiendo gases de efecto invernadero	Los humedales construidos pueden comprender sistemas de vegetación complejos, eficientes para secuestrar carbono y transformar otros gases de la actividad climática, aunque con un riesgo limitado de generación de algunos gases climáticos activos (metano, óxido nitroso) en secciones anaeróbicas. Requiere menor consumo de energía que el drenaje por tuberías durante la fase de construcción, y consum…	La eliminación del hábitat reduce el potencial de secuestro de carbono pero el consumo de energía requerido durante la fase de construcción es moderado, comparado con el drenaje tradicional	El hábitat simple y de bajo porte puede secuestrar carbono y transformar otros gases activos para el clima, aunque en una medida limitada en comparación con hábitats complejos. Requiere menor consumo de energía que el drenaje por tuberías durante la fase de construcción, y consumo moderado durante la etapa de mantenimiento	La infraestructura artificial no es compatible con los ecosistemas que secuestran el carbono pero el consumo de energía requerido durante la fase de construcción es moderado, comparado con el drenaje tradicional	La infraestructura de drenaje pesado no retiene carbono y requiere un gran consumo de energía durante la construcción y el mantenimiento
		Regulación del agua (tiempo y escala de escorrentía, inundación, etc.)	El momento y la magnitud de la escorrentía, la inundación y la recarga de los acuíferos pueden verse fuertemente influenciados por los cambios en la cobertura del suelo, incluidas, en particular, las alteraciones que cambian el potencial de almacenamiento de agua del sistema, como la conversión de humedales o el reemplazo. Los bosques con tierras de cultivo o tierras de cultivo con áreas urbanas	Los humedales construidos proporcionan un hábitat semi natural de mosaico que detiene las aguas de las inundaciones y retarda su liberación a los flujos de tierra y superficie	Produce alivio local de inundaciones y puede reducir el ritmo de la escorrentía, evitando parcialmente el riesgo de reubicar los problemas de inundación en otros lugares	Produce alivio local de inundaciones y puede reducir el ritmo de la escorrentía, evitando parcialmente el riesgo de reubicar los problemas de inundación en otros lugares	Produce alivio local de inundaciones y puede reducir el ritmo de la escorrentía, evitando parcialmente el riesgo de reubicar los problemas de inundación en otros lugares	La infraestructura de drenaje canalizado aborda el alivio de inundaciones locales, pero puede reubicar los problemas de inundaciones en otros lugares
		Regulación de peligros naturales (es decir, protección contra tormentas)	La presencia de ecosistemas costeros, como los manglares y los arrecifes de coral, puede reducir dramáticamente el daño causado por los huracanes o las grandes olas	La compleja estructura del hábitat de los humedales construidos contribuye a la protección del peligro y desplaza la vegetación compleja que realiza los servicios de amortiguación de tormentas	La infraestructura artificial no contribuye a la protección contra peligros, y puede desplazar la vegetación compleja que realiza los servicios de amortiguación de tormentas	El hábitat simple y de bajo porte no contribuye a la protección contra peligros, y desplaza la vegetación compleja que realiza los servicios de amortiguación de tormentas	La infraestructura artificial no contribuye a la protección contra peligros, y puede desplazar la vegetación compleja que realiza los servicios de amortiguación de tormentas	No contribuye a la protección contra riesgos y puede desplazar la vegetación compleja que realiza los servicios de amortiguación de tormentas
		Regulación de plagas	Los cambios en los ecosistemas afectan la prevalencia de plagas y enfermedades de cultivos y ganado	La compleja estructura del hábitat de los humedales construidos puede soportar a los depredadores de los organismos de las plagas, aunque existe el riesgo de que el manejo deficiente ayude a las poblaciones de posibles organismos de las plagas, como ratas y mosquitos	La infraestructura artificial no hace una contribución positiva a la regulación de plagas, pero puede eliminar el hábitat para los depredadores naturales de plagas	El hábitat simple y de bajo porte proporciona un hábitat limitado para los depredadores de organismos plaga, y un riesgo muy bajo de apoyar colonias de organismos plaga	La infraestructura artificial no hace una contribución positiva a la regulación de plagas, pero puede eliminar el hábitat para los depredadores naturales de plagas	No hace una contribución positiva a la regulación de plagas, pero puede eliminar el hábitat para los depredadores naturales de plagas
		Regulación de enfermedades	Los cambios en los ecosistemas pueden cambiar directamente la abundancia de patógenos humanos, como el cólera, y pueden alterar la abundancia de vectores de enfermedades, como los mosquitos	La compleja estructura del hábitat de los humedales construidos atenúa los organismos patógenos, aunque un diseño y manejo deficientes pueden ayudar a las poblaciones de posibles vectores de enfermedades como los mosquitos	Ayuda a eliminar el agua contaminada localmente con una atenuación limitada de posibles organismos patógenos, aunque puede desplazar los riesgos aguas abajo	El simple uso del césped puede eliminar algunos organismos patógenos, aunque los usos mixtos de las cuencas de infiltración pueden exponer a las personas a riesgos acumulados y pocas oportunidades para albergar posibles vectores de enfermedades	Ayuda a eliminar el agua contaminada localmente con una atenuación limitada de posibles organismos patógenos, aunque puede desplazar los riesgos aguas abajo	Puede ayudar a eliminar el agua contaminada localmente, pero puede desplazar los riesgos de concentración aguas abajo
		Regulación de la erosión	La cubierta vegetal desempeña un papel importante en la retención del suelo y en la prevención de deslizamientos de tierra	Los humedales construidos permite la escorrentía y la infiltración progresivas, evitando la erosión local del suelo, excepto en los casos en que se produce un exceso en las precipitaciones extremas	La acumulación de flujos reduce los riesgos de erosión en el sitio y aguas abajo, aunque esta solución se aplica donde las superficies de tierra están selladas para el desarrollo	Las cuencas de infiltración permiten una infiltración progresiva, por lo que evita la erosión local del suelo, excepto en los lugares donde se produce un exceso de precipitaciones	La acumulación de flujos reduce los riesgos de erosión en el sitio y aguas abajo, aunque esta solución se aplica donde las superficies de tierra están selladas para el desarrollo	Los flujos más concentrados de agua pueden exacerbar la erosión tanto hacia arriba como hacia abajo del sistema
		Purificación de agua y tratamiento de residuos	Los ecosistemas pueden ser una fuente de impurezas en el agua dulce, pero también pueden ayudar a filtrar y descomponer los desechos orgánicos introducidos en las aguas interiores y en los ecosistemas costeros y marinos	La compleja estructura de hábitat de mosaico de humedales construidos puede ser altamente eficiente en una variedad de procesos de purificación de agua físicos y químicos	Filtración física limitada, pero la infraestructura artificial realiza procesos de purificación subóptimamente	El hábitat simple y de bajo porte proporciona una purificación fisicoquímica limitada del agua acumulada, aunque no tan eficazmente como un hábitat más complejo	Filtración física limitada, pero la infraestructura artificial realiza procesos de purificación subóptimamente	El hábitat que realiza los procesos de purificación se pierde, sin una purificación sustancial dentro de la infraestructura
		Polinización	Los cambios en los ecosistemas afectan la distribución, abundancia y efectividad de los polinizadores	La compleja estructura del hábitat de los humedales construidos puede soportar poblaciones de organismos polinizadores	El hábitat que apoya a los polinizadores se pierde, y la infraestructura de drenaje artificial no proporciona un hábitat compensatorio	El hábitat simple y de bajo porte proporciona un hábitat limitado para los organismos polinizadores naturales	El hábitat que apoya a los polinizadores se pierde, y la infraestructura de drenaje artificial no proporciona un hábitat compensatorio	Se pierde hábitat de apoyo a los polinizadores
		Regulación de la salinidad (principalmente paisajes áridos).		La emulación de la hidrología natural puede ayudar a evitar los riesgos de salinización de la tierra río abajo a través de infiltraciones amortiguadas y tasas de escorrentía	La emulación de la hidrología natural puede ayudar a evitar los riesgos de salinización de la tierra río abajo a través de infiltraciones amortiguadas y tasas de escorrentía	La emulación de la hidrología natural puede ayudar a evitar los riesgos de salinización de la tierra río abajo a través de tasas de infiltraciones amortiguadas	La emulación de la hidrología natural puede ayudar a evitar los riesgos de salinización de la tierra río abajo a través de infiltraciones amortiguadas y tasas de escorrentía	No tiene impacto
		Regulación de riesgos de incendio (principalmente paisajes áridos).		El hábitat complejo puede crear riesgos de incendio en entornos urbanos, aunque el hábitat de humedal generalmente tiende a ser de bajo riesgo	La falta de vegetación potencialmente combustible reduce el riesgo general de incendio urbano	La estructura simple de las cuencas gestionadas proporciona solo una baja biomasa de vegetación potencialmente combustible, lo que reduce el riesgo general de incendios urbanos	La falta de vegetación potencialmente combustible reduce el riesgo general de incendio urbano	La falta de vegetación potencialmente combustible reduce el riesgo general de incendio urbano
	Servicios culturales	Patrimonio cultural	Muchas sociedades dan gran valor al mantenimiento de paisajes de importancia histórica (“paisajes culturales”) o de especies de importancia cultural. Muchas personas valoran el "sentido de lugar" asociado con las características reconocidas de su entorno, incluidos los aspectos del ecosistema	Los ecosistemas de humedales construidos pueden ser potencialmente una fuente de valor cultural en entornos urbanos	La infraestructura artificial en sí misma no proporciona patrimonio cultural, sino que puede ser una solución que funciona de manera simpática con las estructuras y paisajes del patrimonio	Las cuencas de infiltración contribuyen con un patrimonio cultural mínimo, pero pueden funcionar de manera simpática con las estructuras y paisajes del patrimonio	La infraestructura artificial en sí misma no proporciona patrimonio cultural, sino que puede ser una solución que funciona de manera simpática con las estructuras y paisajes del patrimonio	Las tuberías pesadas tienen poco o ningún valor cultural, con algunas excepciones, como antiguas infraestructuras de drenaje de intereses del patrimonio local, pero en general se percibe como una amenaza
		Recreación y turismo	Las personas a menudo eligen dónde pasar su tiempo de ocio basándose en parte en las características de los paisajes naturales o cultivados en un área en particular	Los ecosistemas de humedales construidos pueden ser de valor recreativo, dependiendo del diseño de los humedales y los conflictos con otros valores (como el hábitat para la vida silvestre), en particular donde los espacios semi naturales están limitados en entornos urbanos	La infraestructura artificial no contribuye a la recreación y al turismo	Las cuencas de infiltración comúnmente sirven como espacios recreativos valiosos, excepto cuando se retiene agua después de fuertes precipitaciones	La infraestructura artificial no contribuye a la recreación y al turismo	Las tuberías de ingeniería pesada carecen de valor recreativo y turístico
		Valor estético	Muchas personas encuentran la belleza o el valor estético en diversos aspectos de los ecosistemas, como se refleja en el apoyo a los parques, los "recorridos paisajísticos" y la selección de ubicaciones de viviendas	Los ecosistemas de humedales construidos pueden ser potencialmente de valor estético en entornos urbanos empobrecidos, con el beneficio adicional de la vegetación compleja que proporciona servicios de amortiguación visual y acústica	La infraestructura artificial no es en sí misma de valor estético, sino que puede ser una solución que funcione de manera simpática con paisajes de uso mixto	Las cuencas de infiltración pueden formar parte del paisajismo de espacios públicos y privados	La infraestructura artificial no es en sí misma de valor estético, sino que puede ser una solución que funcione de manera simpática con paisajes de uso mixto	Las tuberías de ingeniería pesada carecen de valor estético
		Valor espiritual y religioso	Muchas religiones atribuyen valores espirituales y religiosos a los ecosistemas o sus componentes	Los ecosistemas de humedales construidos pueden ser una fuente limitada de valor espiritual en entornos urbanos	La infraestructura artificial no es en sí misma de valor estético, pero puede ser una solución que funciona con simpatía paisajes espiritualmente valorados	Las cuencas de infiltración contribuyen mínimamente a los valores espirituales, pero pueden funcionar de manera simpática con paisajes valorados espiritualmente	La infraestructura artificial no es en sí misma de valor estético, pero puede ser una solución que funciona con simpatía paisajes espiritualmente valorados	Las tuberías de ingeniería pesada carecen de valor espiritual o religioso
		Inspiración del arte, folklore, arquitectura, etc.	Los ecosistemas proporcionan una rica fuente de inspiración para el arte, el folklore, los símbolos nacionales, la arquitectura y la publicidad	Los ecosistemas de humedales construidos pueden ser potencialmente una fuente limitada de valor creativo en entornos urbanos	La infraestructura artificial en sí misma no tiene un valor inspirador, sino que puede ser una solución que funciona de manera simpática con los paisajes	Las cuencas de infiltración pueden encajar de forma simpática con paisajes valorados por cualidades inspiradoras	La infraestructura artificial en sí misma no tiene un valor inspirador, sino que puede ser una solución que funciona de manera simpática con los paisajes	Las tuberías de ingeniería pesada generalmente carecen de valor de inspiración artística, aunque hay un posible interés e inspiración de las estructuras del patrimonio local
		Relaciones sociales (por ejemplo, comunidades de pesca, pastoreo o cultivos)	Los ecosistemas influyen en los tipos de relaciones sociales que se establecen en culturas particulares. Las sociedades pesqueras, por ejemplo, difieren en muchos aspectos en sus relaciones sociales de pastoreo nómada o sociedades agrícolas	Los ecosistemas de humedales construidos pueden ser un foco para intereses comunes y actividades comunitarias en áreas urbanas	Soporte mínimo para las comunidades locales por un interés en el drenaje urbano	Las cuencas de infiltración pueden proporcionar lugares comunales en condiciones secas para reuniones sociales, aunque de menor valor que los espacios naturales	Soporte mínimo para las comunidades locales por un interés en el drenaje urbano	Las tuberías de ingeniería pesada carecen de apoyo para las comunidades locales distintas de las unidas por un interés en el drenaje urbano
		Educación e investigación	Los ecosistemas influyen en los tipos de sistemas de conocimiento desarrollados por diferentes culturas. Los ecosistemas y sus componentes y procesos proporcionan las bases para la educación formal e informal en muchas sociedades	Todas las soluciones de drenaje pueden apoyar actividades de aprendizaje e investigación	Todas las soluciones de drenaje pueden apoyar actividades de aprendizaje e investigación	Todas las soluciones de drenaje pueden apoyar actividades de aprendizaje e investigación	Todas las soluciones de drenaje pueden apoyar actividades de aprendizaje e investigación	Todas las soluciones de drenaje pueden apoyar actividades de aprendizaje e investigación
	Servicios de soporte	Formacion de suelo		Los humedales construidos pueden ser eficientes en la formación del suelo	El pavimento permeable no contribuye a la formación del suelo	Las cuencas de infiltración soportan solo un vástago bajo simple que contribuye a la formación del suelo, aunque subóptimamente	Los drenajes de filtro y las tuberías permeables no contribuyen a la formación del suelo	Las tuberías pesadas no contribuyen a la formación del suelo
		Producción primaria		Los humedales construidos pueden realizar una productividad primaria significativa	La pavimentación permeable no contribuye a la producción primaria	Las cuencas de infiltración soportan solo un vástago bajo simple que contribuye a la producción primaria, aunque subóptimamente	Los drenajes de filtro y las tuberías permeables no contribuyen a la producción primaria	Las tuberías pesadas no contribuyen a la producción primaria
		Ciclo de nutrientes		Los humedales construidos pueden ayudar en el ciclo de nutrientes de forma significativa	El pavimento permeable no contribuye al ciclo de nutrientes	Las cuencas de infiltración soportan solo un vástago bajo simple que contribuye al ciclo de nutrientes, aunque subóptimamente	Los drenajes de filtro y las tuberías permeables no contribuyen al ciclo de nutrientes	Las tuberías pesadas no contribuyen al ciclo de nutrientes
		Reciclaje de agua		Los humedales construidos pueden realizar importantes servicios de retención y reciclaje de agua a escala local	El pavimento permeable no contribuye al reciclaje de agua a escala local	Las cuencas de infiltración solo admiten el uso de césped ligero simple que contribuye de manera subóptima al reciclaje de agua a escala local	Los drenajes de filtro y las tuberías permeables no contribuyen al reciclaje de agua a escala local	Las tuberías pesadas no contribuyen al reciclaje de agua a escala local
		Fotosíntesis (producción de oxígeno atmosférico)		Los humedales construidos pueden realizar procesos fotosintéticos significativos	El pavimento permeable no contribuye a la fotosíntesis	Las cuencas de infiltración solo admiten el uso de césped ligero simple que contribuye de manera subóptima a la fotosíntesis	Los drenajes de filtro y las tuberías permeables no contribuyen a la fotosíntesis	Las tuberías pesadas no contribuyen a la fotosíntesis
		Hábitat para la vida silvestre		Los humedales construidos pueden proporcionar una diversidad de hábitats para la vida silvestre, lo que puede ser de particular valor directamente y como un "escalón" donde el hábitat es escaso en entornos urbanos	El pavimento permeable no proporciona un hábitat útil para la vida silvestre	Las cuencas de infiltración son compatibles solo con césped simple que proporciona algún hábitat para la vida silvestre, aunque no admite diversidad biológica	Los desagües filtrantes y las tuberías permeables no proporcionan un hábitat útil para la vida silvestre	Las tuberías pesadas no proporcionan un hábitat útil para la vida silvestre, excepto para organismos tales como ratas que generalmente pueden considerarse plagas en lugar de activos

## Sheet: Beneficios y servicios
			TIPOLOGÍAS DE DETENCIÓN								TIPOLOGÍAS DE RETENCIÓN						TIPOLOGÍAS DE INFILTRACIÓN						TIPOLOGÍAS DE INFILTRACIÓN
		Servicios ecosistemicos	Alcorque inundables		Cuenca seca de drenaje extendido		Cunetas verdes		Zonas de biorretención		Humedales artificiales		Pondajes húmedos		Tanques de almacenamiento		Cuencas de infiltración		Pavimentos porosos		Pozos de infiltración		Filtros de arena		Zanjas de infiltración
	Servicios de provisión	Agua dulce	Los sistemas de árboles integrados y vinculados brindan mayor capacidad, flexibilidad y oportunidades para transmitir y utilizar flujos de excedencia de manera efectiva	Kellagher et al., 2015					Existe una reducción potencial de los requisitos de riego al aprovechar el escurrimiento del sitio	Urban Drainage and Flood Control District, 2010			Se pueden utilizar como almacenes para esquemas de reutilización	CSIRO, 2005	Los sistemas de tanques de almacenamiento pueden proporcionar un valor de servicio si están almacenando agua para su uso	Kellagher et al., 2015	Promueven la recarga de agua subterránea	University of Arkansas Community Design Center, 2018	El agua se almacena temporalmente debajo de la superficie suprayacente antes del uso, la infiltración al suelo o la descarga controlada aguas abajo	Kellagher et al., 2015
			Pueden drenar a través de la infiltración profunda y proporcionar recarga de agua subterránea	Edmonton, 2014											Recolección de agua de lluvia para su reutilización, generalmente desde una azotea	Alabama Department of Environmental Management, 2014
															Reutilización de la escorrentía en el riego o usos no potables aprobados	Edmonton, 2014
															La recolección de agua de lluvia implica la recolección, almacenamiento y reutilización de la escorrentía de los techos.	University of Arkansas Community Design Center, 2018
															Iniciativas que pueden implementarse para lograr tal objetivo de conservación de agua potable	CSIRO, 2005
															Son una forma efectiva de capturar aguas pluviales para uso no potable (como el riego de jardines, el inodoro, en lavadoras y para lavar automóviles) y, por lo tanto, ayudan a conservar los suministros de agua potable	Emma Monk and Lisa Chalmers, 2007
															Disminuir la demanda en el suministro de agua municipal y los costos de agua para el usuario final, cuando se utiliza como parte de un sistema de recolección de agua de lluvia de acuerdo con las restricciones de los códigos de la ciudad, el estado y el estado	Philadelphia Water Department, 2018
		Alimentos y fibra	Proporciona una fuente de alimento	Kellagher et al., 2015
		Combustible
		Recursos genéticos
		Productos bioquímicos, medicinas naturales y productos farmacéuticos
		Recursos ornamentales							Si se aplica la siembra ornamental se debe utilizar una variedad de especies para dar interés durante todo el año	Kellagher et al., 2015
	Servicios de regulación	Mantenimiento de la calidad del aire	Filtra contaminantes dañinos del aire / Reduce el ruido no deseado	Kellagher et al., 2015					Puede contribuir a mejorar la calidad del aire	Philadelphia Water Department, 2018	Puede contribuir a mejorar la calidad del aire	Philadelphia Water Department, 2018	Puede contribuir a mejorar la calidad del aire	Philadelphia Water Department, 2018
		Regulación del clima (microclima)	Reducir el consumo anual de energía en los edificios al moderar el clima local, es decir, mantenerlo más fresco en verano y más cálido en invierno	Kellagher et al., 2015					Pueden proporcionar enfriamiento del microclima local debido a la evapotranspiración	Kellagher et al., 2015	Ayuda a reducir los impactos de las islas de calor urbano	Philadelphia Water Department, 2018	Ayuda a reducir los impactos de las islas de calor urbano	Philadelphia Water Department, 2018					Aminora el efecto de isla de calor	Philadelphia Water Department, 2018
			Reducción del efecto de isla de calor urbano	University of Arkansas Community Design Center, 2018)					Puede ayudar a reducir los impactos de las islas de calor urbano	Philadelphia Water Department, 2018
		Regulación del clima (clima global)	Absorbe y almacena el dióxido de carbono atmosférico (secuestro de carbono)	Kellagher et al., 2015
		Regulación del agua	Manejo de aguas superficiales (transpiración, intercepción, infiltración)	Kellagher et al., 2015	Proporciona almacenamiento de escorrentía y atenuación del flujo . Cuando la cuenca tiene vegetación se puede usar para prevenir la escorrentía del sitio para eventos de lluvia pequeños (Intercepción)	Kellagher et al., 2015	Diseñadas para transmitir, tratar y, a menudo, atenuar la escorrentía del agua superficial. Facilita la evapotranspiración y la infiltración en el suelo subyacente.	Kellagher et al., 2015	La escorrentía recogida por el sistema se acumula temporalmente en la superficie y luego se filtra a través de la vegetación y los suelos subyacentes. Parte se eliminará mediante la evaporación y la transpiración de la planta	Kellagher et al., 2015	Pueden ayudar a reducir las tasas de flujo de un sitio al controlar la tasa de descarga y permitir que el volumen de almacenamiento temporal se llene durante los eventos de tormenta	Kellagher et al., 2015	Pueden ayudar a reducir las tasas de flujo de un sitio al controlar la tasa de descarga y permitir que el volumen de almacenamiento temporal se llene durante los eventos de tormenta	Kellagher et al., 2015	La mayoría de los métodos para proporcionar atenuación se entienden bien en términos de diseño / rendimiento estructural (es decir, tuberías y arcos en diversos materiales y alcantarillas)	Kellagher et al., 2015	Facilitan la descarga de la escorrentía de agua superficial al suelo y, en última instancia, al agua subterránea	Kellagher et al., 2015	Eficaz para gestionar la escorrentía del agua superficial cerca de su fuente: interceptar la escorrentía, reducir el volumen y la frecuencia de la escorrentía	Kellagher et al., 2015	Permite el almacenamiento temporal del agua antes de que se empape en el suelo	Kellagher et al., 2015	Reducen la descarga máxima al recoger y reducir la velocidad de la escorrentía a medida que el agua fluye a través del filtro	University of Arkansas Community Design Center, 2018	Crean almacenamiento temporal en el subsuelo para la atenuación, el transporte y la filtración de la escorrentía de agua superficial	Kellagher et al., 2015
			Los sistemas de raíces de árboles captan la escorrentía de aguas pluviales capturada desde la calle al filtro de caja	University of Arkansas Community Design Center, 2018)			Reducen el flujo máximo de escorretía, detienen las aguas pluviales y aumentan la infiltración	University of Arkansas Community Design Center, 2018)	Diseñadas para infiltrar la escorrentía de aguas pluviales	University of Arkansas Community Design Center, 2018	Los niveles de agua aumentan durante los eventos de lluvia y las salidas están configuradas para liberar los flujos lentamente	CSIRO, 2005	Forman parte de un sistema de retardo de inundaciones y los requisitos de diseño generalmente se asocian con estructuras hidráulicas para el flujo y la atenuación de las inundaciones	CSIRO, 2005	La recolección de agua de lluvia reduce el volumen de escorrentía y los flujos máximos	University of Arkansas Community Design Center, 2018	Diseñados para detener e infiltrar temporalmente la escorrentía de aguas pluviales	University of Arkansas Community Design Center, 2018	Ayuda a reducir y distribuir el volumen de aguas pluviales, fomentando la infiltración de aguas subterráneas	University of Arkansas Community Design Center, 2018			Durante flujos más altos, el agua puede acumularse en la superficie del filtro de arena y aumentar el volumen de agua que se puede tratar	CSIRO, 2005	La escorrentía se filtra gradualmente a través de una zanja diseñada con suelo modificado durante un período de tiempo determinado	University of Arkansas Community Design Center, 2018
			Proporcionan gestión de aguas pluviales mediante la absorción, evapotranspiración e intercepción	Edmonton, 2014			Diseñados para reducir la velocidad del flujo y reducir los volúmenes a través de la infiltración de la superficie y la evapo-transpiración.	Edmonton, 2014	Utiliza plantas y suelos para filtrar, retener, infiltrar y distribuir la escorrentía de aguas pluviales	Edmonton, 2014					Sirven para retardar una inundación siempre que se disponga de un almacenamiento temporal adecuado	CSIRO, 2005	Diseñada para capturar y almacenar la escorrentía de aguas pluviales en la superficie antes de infiltrarse en los suelos	Emma Monk and Lisa Chalmers, 2007	Permite la infiltración de la escorrentía	Emma Monk and Lisa Chalmers, 2007					Las aguas pluviales canalizadas ingresan al sistema, a menudo a través de un sistema de tratamiento previo, según las características de la cuenca, y fluyen hacia la zanja o las jaulas donde el agua se filtra hacia el suelo circundante	Emma Monk and Lisa Chalmers, 2007
							Diseñadas transportar e infiltrar las aguas pluviales	Alabama Department of Environmental Management, 2014	Las tasas de escorrentía y los volúmenes de escorrentía máximos pueden reducirse y las aguas subterráneas pueden recargarse	Alabama Department of Environmental Management, 2014	Proporcionan un almacenamiento temporal de aguas pluviales	Alabama Department of Environmental Management, 2014	Atenúa el flujo de escorrentía, al mismo tiempo que ofrece comodidades estéticas y hábitat de vida silvestre	Philadelphia Water Department, 2018	Se puede utilizar como una forma de gestión de escorrentía en la azotea para reducir la escorrentía de superficies impermeables	Alabama Department of Environmental Management, 2014			Proporciona una reducción volumétrica de la escorrentía a través del almacenamiento temporal. Se puede utilizar para reducir los flujos máximos y promover la infiltración de aguas pluviales en la urbanización de cuencas	Alabama Department of Environmental Management, 2014
							Se utilizan para transportar aguas pluviales en lugar de tuberías y proporcionar un amortiguador deseable entre las aguas receptoras (por ejemplo, un arroyo o un humedal) y las áreas impermeables de una cuenca	CSIRO, 2005	Proporcionan cierto retardo de flujo para eventos frecuentes de lluvia	CSIRO, 2005					Proporcionan beneficios adicionales de reducir la escorrentía de captación (flujo máximo y volúmenes) de eventos de lluvia más pequeños	Emma Monk and Lisa Chalmers, 2007
							Reducir los volúmenes de escorrentía	Urban Drainage and Flood Control District, 2010	Muy eficaz para reducir los volúmenes de escorrentía	Philadelphia Water Department, 2018	Atenúa el flujo de escorrentía, al mismo tiempo que ofrece comodidades estéticas y hábitat de vida silvestre	Philadelphia Water Department, 2018							Reduce la escorrentía superficial de aguas pluviales	Philadelphia Water Department, 2018	Puede ser una buena opción para cumplir con el requisito de control de inundaciones para sitios restringidos	Philadelphia Water Department, 2018
		Control biológico
		Regulación de enfermedades	Ayuda a mejorar la salud y el bienestar de las comunidades locales	Kellagher et al., 2015
		Control de la erosión							También proporcionan retraso en el flujo	CSIRO, 2005
		Purificación de agua y tratamiento de residuos	Fitorremediación: en el proceso de extracción de agua del suelo, los árboles acumulan trazas de sustancias químicas nocivas. Los suelos alrededor de los árboles se pueden usar para filtrar los contaminantes directamente de la escorrentía	Kellagher et al., 2015	Pueden ser depresiones con vegetación que pueden proporcionar tratamiento cuando se diseñan para administrar flujos regulares (eliminación de sedimentos y materiales flotantes y reducción de los niveles de nutrientes, metales pesados, materiales tóxicos)	Kellagher et al., 2015	Facilita la sedimentación y la filtración a través de la zona de la raíz y la matriz del suelo	Kellagher et al., 2015	Pueden tratar la contaminación mediante el uso de suelos y vegetación diseñados	Kellagher et al., 2015	Las masas densas de vegetación facilitan la adhesión de contaminantes a la vegetación, la descomposición aeróbica de los contaminantes y también pueden ayudar a estabilizar los sedimentos sedimentados y prevenir la resuspensión	Kellagher et al., 2015	Las masas densas de vegetación facilitan la adhesión de contaminantes a la vegetación, la descomposición aeróbica de los contaminantes y también pueden ayudar a estabilizar los sedimentos sedimentados y prevenir la resuspensión	Kellagher et al., 2015	Los sistemas de tanques de almacenamiento no proporcionan ninguna forma de tratamiento de la escorrentía de aguas superficiales	Kellagher et al., 2015	La sedimentación tiende a ocurrir dentro del área de almacenamiento temporal	Kellagher et al., 2015	Los procesos de tratamiento que ocurren dentro de la estructura de la superficie, la matriz del subsuelo y las capas de geotextil incluyen filtración, adsorción, biodegradación y sedimentación	Kellagher et al., 2015	La sedimentación tiende a ocurrir dentro del área de almacenamiento temporal	Kellagher et al., 2015	Útiles para cumplir con el requisito de calidad del agua en lugares con limitaciones de espacio o altamente desarrollados	Philadelphia Water Department, 2018	Pueden ayudar a reducir los niveles de contaminantes en la escorrentía al filtrar sedimentos finos, metales, hidrocarburos y otros contaminantes. También pueden favorecer los procesos de adsorción y biodegradación	Kellagher et al., 2015
							Generalmente son más efectivas para eliminar los sedimentos y nutrientes adheridos a este sedimento	Emma Monk and Lisa Chalmers, 2007
			Los sistemas de raíces de árboles tratan la escorrentía de aguas pluviales capturada desde la calle al filtro de caja	University of Arkansas Community Design Center, 2018)			Diseñada para filtrar los contaminantes de las aguas pluviales	Alabama Department of Environmental Management, 2014	Eliminan los contaminantes en la escorrentía de aguas pluviales a través de la adsorción, filtración, sedimentación, volatilización, intercambio iónico y descomposición biológica	Alabama Department of Environmental Management, 2014	La reducción de los flujos máximos aguas abajo ayuda a la disminución de las cargas de sedimentos que entran en las corrientes. La filtración de contaminantes y la absorción de nutrientes de las plantas mejora la calidad del agua	Alabama Department of Environmental Management, 2014	Las plantas sumergidas son importantes para el mantenimiento de los procesos biológicos y la calidad del agua	CSIRO, 2005	El equipo de filtración y purificación debe incorporarse cuando se utiliza el escurrimiento de aguas pluviales para usos potables	University of Arkansas Community Design Center, 2018	Mejoran la calidad del agua mediante el filtrado de la escorrentía de aguas pluviales a través del suelo. Utilizan plantas facultativas para la fitorremediación para mitigar los contaminantes de la escorrentía	University of Arkansas Community Design Center, 2018	Reducen la carga de contaminantes de la escorrentía	Edmonton, 2014			Administrar las cargas de nutrientes en la primera descarga de escorrentía. Atrapan nitratos, fosfatos, hidrocarburos, metales y sedimentos	University of Arkansas Community Design Center, 2018	Filtran partículas a medida que la escorrentía de aguas pluviales se mueve a través de los medios. Estas instalaciones promueven el crecimiento de algas que sirven como digestores de contaminantes	University of Arkansas Community Design Center, 2018
							Eliminación de sedimentos y constituyentes de la escorrentía a través del filtrado	Urban Drainage and Flood Control District, 2010	Muy eficaz para eliminar contaminantes	Philadelphia Water Department, 2018	Puede ser eficaz para proporcionar el tratamiento de los requisitos de calidad del agua	Philadelphia Water Department, 2018	Puede ser eficaz para proporcionar el tratamiento de los requisitos de calidad del agua	Philadelphia Water Department, 2018	Muchos dispositivos subterráneos pueden ser efectivos para la eliminación de partículas en la escorrentía de aguas pluviales y la eliminación de sólidos brutos	Urban Drainage and Flood Control District, 2010	La vegetación proporciona un tratamiento de calidad del agua y la red de raíces ayuda a evitar que se obstruya el suelo de la cuenca	Emma Monk and Lisa Chalmers, 2007	Es muy eficaz para retener los metales disueltos	Emma Monk and Lisa Chalmers, 2007			El filtrado proporciona una mejora efectiva de la calidad del agua, incluida la eliminación del fósforo	Urban Drainage and Flood Control District, 2010
							Puede incluir una capa de infiltración para proporcionar un tratamiento mejorado de la calidad del agua y promover la infiltración	Edmonton, 2014	La mitigación de contaminantes se logra a través de procesos de fitorremediación a medida que la escorrentía pasa a través de la planta y la comunidad del suelo	University of Arkansas Community Design Center, 2018	Ofrecen una gama completa de servicios ecosistémicos para tratar las aguas pluviales contaminadas	University of Arkansas Community Design Center, 2018	Eliminan los contaminantes a través de los procesos de captación biológica y sedimentación	University of Arkansas Community Design Center, 2018	Para mejorar la calidad del agua almacenada, los tanques pueden equiparse con los "primeros desviadores de descarga". Uso de sdesinfección UV para reducir patógenos.	CSIRO, 2005			Elimina los sedimentos y otros contaminantes	University of Arkansas Community Design Center, 2018			Son dispositivos de tratamiento particularmente útiles en áreas muy urbanizadas y construidas	CSIRO, 2005
							La interacción entre el flujo y la vegetación a lo largo de los swales facilita el asentamiento de contaminantes y retencion	CSIRO, 2005	Proporciona tratamiento a la escorrentía través de filtración fina, detención prolongada y cierta absorción biológica	CSIRO, 2005	Diseñados principalmente para eliminar los contaminantes de las aguas pluviales asociados con partículas finas a partículas coloidales y contaminantes disueltos	CSIRO, 2005
							Promueve procesos de sedimentación	University of Arkansas Community Design Center, 2018)	Involucra múltiples procesos de tratamiento para eliminar contaminantes, incluidos la sedimentación,filtración, adsorción, evapotranspiración y absorción biológica	Urban Drainage and Flood Control District, 2010									Brindan un tratamiento de calidad del agua en un área que cumple más de un propósito	Urban Drainage and Flood Control District, 2010
		Polinización
	Servicios culturales	Diversidad cultural
		Sentido de pertenencia
		Valores del patrimonio cultural
		Recreación y turismo			Puede usar como una instalación recreativa o adaptarse a un paisaje específico.	Kellagher et al., 2015					Los estanques pueden ser el punto focal de un área recreativa	Kellagher et al., 2015	Los estanques pueden ser el punto focal de un área recreativa	Kellagher et al., 2015	Pueden promover el uso multifuncional del espacio, al permitir que la superficie sobre el tanque se use para recreación u otras instalaciones de servicios	Kellagher et al., 2015	Si la superficie va a ser utilizada por peatones o utilizada para practicar deportes informales, esto puede hacer que la superficie se compacte y requiera un mantenimiento más frecuente para mantener la capacidad de infiltración	Kellagher et al., 2015			No suelen tener ningún valor de equipamiento inherente, pero los sistemas subsuperficiales pueden promover el uso multifuncional del espacio al permitir que la superficie que lo rodea se utilice para recreación u otras instalaciones de servicios	Kellagher et al., 2015
											Proporcionan un hábitat para la vida silvestre y un enfoque para la recreación, como senderos y áreas de descanso.	CSIRO, 2005	Se pueden utilizar para proporcinar características de forma de terreno urbano para recreación	CSIRO, 2005			Se utilizan normalmente en aplicaciones como parques públicos de espacios abiertos	Emma Monk and Lisa Chalmers, 2007
					Fomenta el diseño de la parte estética de un entorno naturalizado o para incluir espacios abiertos pasivos y / o activos	Urban Drainage and Flood Control District, 2010					Brinda oportunidades de recreación, estética y espacios abiertos	Urban Drainage and Flood Control District, 2010	Brinda oportunidades de recreación, estética y espacios abiertos	Urban Drainage and Flood Control District, 2010
		Valor estético	Agrega belleza y carácter al paisaje urbano y eleva el valor de las áreas residenciales y comerciales	Kellagher et al., 2015	La forma y el aspecto estético del componente dependerán de las características específicas del sitio, los objetivos de paisaje / amenidad y los criterios de diseño del desarrollo	Kellagher et al., 2015	Cuando se incorporan al diseño del sitio, pueden mejorar el paisaje natural y proporcionar beneficios estéticos y de biodiversidad	Kellagher et al., 2015	Pueden ofrecer importantes beneficios estéticos al incorporar vegetación en el paisaje urbano y en las características generales del paisaje	Kellagher et al., 2015	Los cuerpos de agua permanentes bien diseñados y mantenidos pueden ofrecer importantes beneficios estéticos, de servicios y de vida silvestre a los sitios de desarrollo	Kellagher et al., 2015	Los cuerpos de agua permanentes bien diseñados y mantenidos pueden ofrecer importantes beneficios estéticos, de servicios y de vida silvestre a los sitios de desarrollo	Kellagher et al., 2015	Los tanques se pueden usar junto con otras características de la superficie para que el aumento del nivel de agua en esas características se pueda minimizar para maximizar el valor de sus servicios y minimizar los riesgos de salud y seguridad.	Kellagher et al., 2015	Si la cuenca es puramente estética o biodiversa y no se utiliza como un espacio de recreación activa o pasiva	Kellagher et al., 2015	Pueden proporcionar amenidades en forma tanto de utilidad (es decir, que ofrecen un uso flexible y múltiple del espacio para una amplia gama de actividades) y los aspectos visuales de los materiales de la superficie (sistemas de césped)	Kellagher et al., 2015	El valor ecológico del sistema se puede mejorar diversificando la siembra	Kellagher et al., 2015			Los drenajes de los filtros se pueden diseñar de forma creativa para proporcionar atractivas líneas de borde	Kellagher et al., 2015
							Pueden mejorar la estética del sitio y proporcionar un hábitat para la vida silvestre, dependiendo del tipo de pasto plantado	University of Arkansas Community Design Center, 2018)	Puede mejorar los valores de las propiedades y la estética del sitio a través de paisajes atractivos	Philadelphia Water Department, 2018	Ofrece comodidades estéticas	Philadelphia Water Department, 2018	Ofrece comodidades estéticas	Philadelphia Water Department, 2018
									Pueden crear paisajes atractivos urbanos y proporcionar características paisajísicas en un desarrollo urbano	CSIRO, 2005	Servicios visuales para el espacio verde de la comunidad	Alabama Department of Environmental Management, 2014	Los cuerpos de agua realzan los paisajes locales	CSIRO, 2005
											Pueden mejorar la estética de un desarrollo y ser una característica central en un paisaje	CSIRO, 2005
									Reflejan el carácter de su entorno o se convertirán en características distintivas dentro de su entorno	Urban Drainage and Flood Control District, 2010	Brinda oportunidades estéticas	Urban Drainage and Flood Control District, 2010	Brinda oportunidades estéticas	Urban Drainage and Flood Control District, 2010
		Valor espiritual y religioso
		Inspiración del arte, folklore, arquitectura, etc.
		Relaciones sociales
		Sistema de conocimiento (tradicional y formal)
		Valores educativos									Los estanques pueden proporcionar un recurso educativo para las escuelas locales y los grupos del entorno comunitario	Kellagher et al., 2015	Los estanques pueden proporcionar un recurso educativo para las escuelas locales y los grupos del entorno comunitario	Kellagher et al., 2015
	Servicios de soporte	Formacion de suelo
		Producción primaria
		Ciclo de nutrientes									Utilizan procesos biológicos, químicos y físicos complejos para ciclar los nutrientes	Alabama Department of Environmental Management, 2014
		Ciclo del agua
		Producción de oxígeno atmosférico											El oxígeno liberado durante la fotosíntesis es importante para mantener la saturación de oxígeno en la columna de agua que se agota por la respiración animal y la descomposición de la materia orgánica	CSIRO, 2005

## Sheet: SUDS (ES)
		High potential of ecosystem service generation	4
		Moderated potential of ecosystem service generation	3
		Potential of ecosystem service generation with design adjustment or additional practices	2
		Low potential of ecosystem service generation	1
		Cero potential of ecosystem service generation	0
	Category	Services	Detention SUDS types					Retention SUDS types			Infiltration SUDS types			Filtration SUDS types
			Tree boxes	Extended dry retention basin	Gassed swales	Green roofs	Bioretention zones	Constructed wetlands	Wet ponds	Storage tanks	Infiltration basins	Permeable pavement	Infiltration ponds	Sand filters	Infiltration trenches
	Provision services	Fresh water	4	2	4	4	4	4	4	4	4	4	4	4	4	50
		Food and fibers	2	2	2	2	2	2	1	0	1	0	0	2	1	17
		Oil and fuel	2	2	2	2	2	2	1	0	1	0	0	2	1	17
		Genetic resources	2	2	2	2	2	2	1	0	1	0	0	2	1	17
		Biochemical products, natural medicine and pharmaceutical products	2	2	2	2	2	2	1	0	1	0	0	2	1	17
		Ornamental resources	2	2	2	2	2	2	1	0	1	0	0	2	1	17
	Regulation services	Air quality regulation	4	2	2	4	4	4	1	0	1	1	0	2	2	27
		Microclimate regulation	4	4	4	4	4	4	4	0	4	3	1	2	2	40
		Global climate regulation	4	4	4	4	4	4	3	0	4	2	0	2	2	37
		Water regulation	4	4	4	4	4	4	4	4	4	4	4	4	4	52
		Biologic control ( pelage)	1	1	1	1	1	1	1	0	1	1	0	1	1	11
		Diseases regulation	3	2	2	3	3	3	1	0	1	1	0	1	1	21
		Erosion control	3	3	3	0	3	3	1	0	3	1	0	1	1	22
		Water and waste treatment	4	3	3	3	4	4	3	2	4	4	4	4	4	46
		Pollination	3	2	2	3	3	3	1	0	1	1	0	2	1	22
		Natural disaster protection	1	1	1	0	1	1	1	0	1	1	1	1	1	11
	Cultural services	Cultural diversity	0	0	0	0	0	0	0	0	0	0	0	0	0	0
		Belonging feeling	2	2	2	2	2	2	2	1	2	2	2	2	2	25
		Cultural patrimonial values	2	2	2	2	2	2	2	1	2	2	2	2	2	25
		Recreational values	1	2	1	1	1	2	2	1	2	2	1	1	1	18
		Aesthetic value	4	4	4	4	4	4	4	2	4	2	1	2	2	41
		Spiritual value	2	2	2	2	2	2	2	0	2	1	1	1	1	20
		Inspiration value	2	2	2	2	2	2	2	0	2	1	1	1	1	20
		Social relationships	1	2	1	1	1	2	2	0	2	2	1	1	1	17
		Knowledge value	3	3	3	3	3	3	3	3	3	3	3	3	3	39
		Educative value	3	3	3	3	3	3	3	3	3	3	3	3	3	39
	Support services	Soil formation	4	2	2	0	4	2	2	0	1	1	1	1	1	21
		Primary production	3	2	2	0	3	3	1	0	1	1	1	1	1	19
		Nutrient cycle	4	3	3	3	4	4	3	0	3	1	1	1	2	32
		Water cycle	4	4	4	4	4	4	4	1	4	3	3	4	4	47
		Atmospheric oxygen production	4	4	4	4	4	4	1	0	4	2	1	2	2	36
			84	75	75	71	84	84	62	22	68	49	36	59	54

## Sheet: Score and selection ES
	Category	Service	Rank		Category	Service	Rank
	Regulation services	Water regulation	52		Regulation services	Water regulation	52
	Provision services	Fresh water	50		Provision services	Fresh water	50
	Regulation services	Water and waste treatment	46		Regulation services	Water and waste treatment	46
	Support services	Water cycle	47		Cultural services	Aesthetic value	41
	Cultural services	Aesthetic value	41		Regulation services	Microclimate regulation	40
	Regulation services	Microclimate regulation	40		Cultural services	Knowledge value	39
	Cultural services	Knowledge value	39		Cultural services	Educative value	39
	Cultural services	Educative value	39		Regulation services	Global climate regulation	37
	Regulation services	Global climate regulation	37		Regulation services	Air quality regulation	27
	Support services	Atmospheric oxygen production	36
	Support services	Nutrient cycle	32
	Regulation services	Air quality regulation	27
	Cultural services	Belonging feeling	25
	Cultural services	Cultural patrimonial values	25
	Regulation services	Erosion control	22
	Support services	Soil formation	21
	Regulation services	Pollination	22
	Support services	Primary production	19
	Regulation services	Cultural diversity	21
	Cultural services	Spiritual value	20
	Cultural services	Inspirational value	20
	Cultural services	Recreational value	18
	Cultural services	Social relationship	17
	Provision services	Food and fibers	17
	Provision services	Oil and fuel	17
	Provision services	Genetic resources	17
	Provision services	Biochemical products, natural medicine and pharmaceutical products	17
	Provision services	Ornamental resources	17
	Regulation services	Natural disaster protection	11
	Regulation services	Biologic control ( pelage)	11
	Cultural services	Cultural diversity	0

## Sheet: Métodos de valoración
	Categoría	Servicios	Precio de mercado directo	Precio de mercado indirecto					Valoración contingente	Valoración grupal
				Costo evitado	Costo reemplazado	Factor de ingreso	Costo de viaje	Precios hedónicos
	Servicios de provisión	Agua dulce	+++	O	++	O	O	O	O	O
		Alimentos y fibra	+++		O	++			+	O
		Combustible	+++		O	++			+	O
		Recursos genéticos	+++		O	++			O	O
		Prod. bioquímicos y farmacéuticos	+++	O	O	++			O	O
		Recursos ornamentales	+++		O	++		O	O	O
	Servicios de regulación	Mantenimiento de la calidad del aire		O	+++	O		O	++	O
		Regulación del clima (microclima)		+++	O	O			O	O
		Regulación del clima (clima global)		+++	O	O			O	O
		Regulación del agua	+	++	O	+++		O	O	O
		Control biológico (plagas)	+	O	+++	++			O	O
		Control de la erosión		+++	++	O		O	O	O
		Tratamiento de agua y residuos		O	+++	O		O	++	O
		Polinización	O	+	+++	++			0	O
	Servicios culturales	Recreación y turismo	+++		O	++	++	+	+++
		Valor estético			O		O	+++	0	O
		Valor espiritual y religioso					O	O	+++	O
		Inspiración del arte, folklore, arquitectura		O		O	O	O	+++	O
		Sistema de conocimiento	+++			O	O		O	O
		Valores educativos	+++			O	O		O	O
	Servicios soporte	Formación de suelo		+++	O	O			O	O
		Ciclo de nutrientes		O	+++	O			O	O

## Sheet: Hoja4
Categoría	Servicio	Enfoque de valoración	Tipo de valor	Categoría de VET	Método de valoración	Ejemplo
Provisión	Agua dulce	Antropocéntrico	Uso	Uso directo	Precio de mercado	Uso del agua almacenada o descargada (tarifas del acueducto) *
						Recarga de acuíferos
Regulación	Regulación del agua	Antropocéntrico	Uso	Uso indirecto	Costo evitado	Reducción en las necesidades de tratamiento del agua residual *
					Costo evitado	Reducción de inundaciones (prevención de daños a la propiedad)
					Precios hedónicos	Valoración del riesgo de inundación en los mercados inmobiliarios
	Purificación y tratamiento de agua y residuos	Antropocéntrico	Uso	Uso indirecto	Costo de reemplazo	Reducción en las necesidades de tratamiento del agua residual *
					Precios hedónicos	Impacto de los cambios en la claridad del agua en los valores de las propiedades
					Valor contingente	Disposición a pagar por una mejora en el estado de un cuerpo de agua
	Regulación del clima (microclima)	Antropocéntrico	Uso	Uso indirecto	Costo evitado	Costos evitados en actividades de distención
	Regulación del clima (clima global)	Antropocéntrico	Uso	Uso indirecto	Costo evitado	Costo asociado con la reducción de CO2
	Mantenimiento de la calidad del aire	Antropocéntrico	Uso	Uso indirecto	Costo evitado	Costos evitados en salud
Socioculturales	Valor estético	Antropocéntrico	Uso	Opción	Precios hedónicos	Precio de bienes comercializados (propiedades)
	Valores educativos	Antropocéntrico	Uso	Opción	Precio de mercado	Cursos de educación ambiental
